# Supplementary material for: Characterization of residual microRNAs in AAV vector batches produced in HEK293 mammalian cells and Sf9 insect cells
Source: PubMed Central journal article supplement — Mol Ther Methods Clin Dev. 2024 Jul 25;32(3):101305. doi: 10.1016/j.omtm.2024.101305 (PMC11365364; doi:10.1016/j.omtm.2024.101305), 2024-07-25
Supplement: mmc1.pdf [file mmc1.pdf]

**Supplemental information**

**Characterization of residual microRNAs in AAV  
vector batches produced in HEK293 mammalian  
cells and Sf9 insect cells**

**Magalie Penaud-Budloo, Emilie Lecomte, Quentin Lecomte, Simon Pacouret, Frédéric Broucque, Aurélien Guy-Duché, Jean-Baptiste Dupont, Laurence Jeanson-Leh, Cécile Robin, Véronique Blouin, Eduard Ayuso, and Oumeya Adjali**

1 2 3 4 5 6 7 8

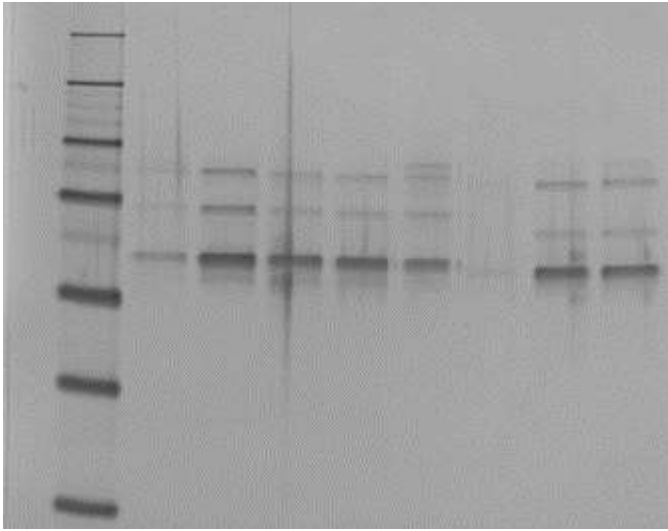

| Lane         | 1    | 2       | 3    | 4    | 5          | 6    | 7    | 8          |
|--------------|------|---------|------|------|------------|------|------|------------|
| Batch        | 9    | 7       | 6    | 1    | 2          | 5    | 3    | 4          |
| Sample       | AAV8 | AAV8    | AAV8 | AAV8 | AAV8 empty | AAV2 | AAV2 | AAV2 empty |
| Purification | IA   | IA+CsCl | CsCl | CsCl | CsCl       | CsCl | CsCl | CsCl       |
| Purity (%)   | 93.2 | 85.6    | 73.7 | 85.2 | 76.0       | nd   | 100  | 95.5       |

**Figure S1: Quality controls of rAAV batches produced in HEK293 cells.** Purity was determined by SDS-PAGE realized from  $2 \times 10^{10}$  total particles per rAAV sample, and expressed in percentage of AAV VP1, VP2 and VP3 proteins to total proteins. nd: not determined.

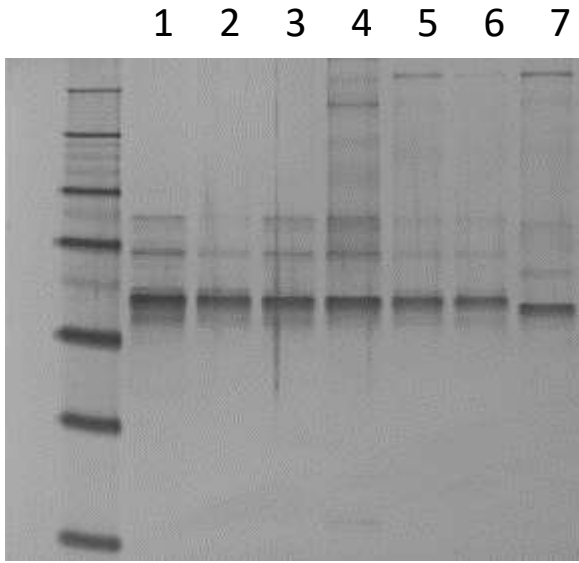

| Lane         | 1    | 2       | 3          | 4    | 5    | 6    | 7    |
|--------------|------|---------|------------|------|------|------|------|
| Batch        | 15   | 13      | 14         | 10   | 11   | 12   | 16   |
| Serotype     | AAV8 | AAV8    | AAV8 empty | AAV8 | AAV8 | AAV8 | AAV2 |
| Purification | IA   | IA+CsCl | IA+CsCl    | CsCl | CsCl | CsCl | CsCl |
| Purity (%)   | 79.5 | 84.7    | 79.5       | 56.1 | 84.5 | 85.7 | 78.9 |

**Figure S2: Quality controls of rAAV batches produced in Sf9 cells.** Purity was determined by SDS-PAGE realized from  $2 \times 10^{10}$  total particles per rAAV sample, and expressed in percentage of AAV VP1, VP2 and VP3 proteins to total proteins.

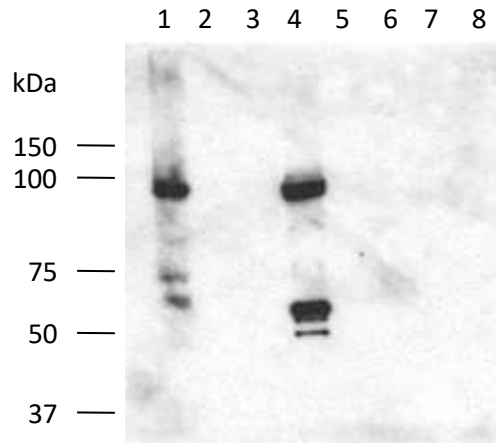

**Figure S3: Detection of Ago-2 in AAV samples by Western Blot.**

5  $\mu$ g of HEK293 total protein extract (1) and 25  $\mu$ L of purified empty or full rAAV were loaded on a 4-12% acrylamide tris gel. AAV2 (5) and AAV8 (2, 3, 4, 6, 7, 8) vectors were produced in HEK293 cells and purified by CsCl gradient ultracentrifugation (2 to 5), IA column (6) or CsCl followed by IA (7, 8). After SDS-PAGE, western blot was realized using the anti-Argonaute-2 antibody (Abcam, ab186733) diluted at 1:1000 and the donkey anti-rabbit IgG-HRP (Jackson ImmunoResearch, 711-035-152) at 1:20000 as secondary antibody. Predicted Ago-2 molecular weight is 97 kDa. The anti-Ago-2 antibody does not recognize Argonaute proteins of Sf9 insect cells. For rAAV batch correspondence, refer to Table S3: batch 6 (2), batch 1 (3), batch 2 (4), batch 3 (5), batch 9 (6), batch 7 (7) and batch 8 (8).

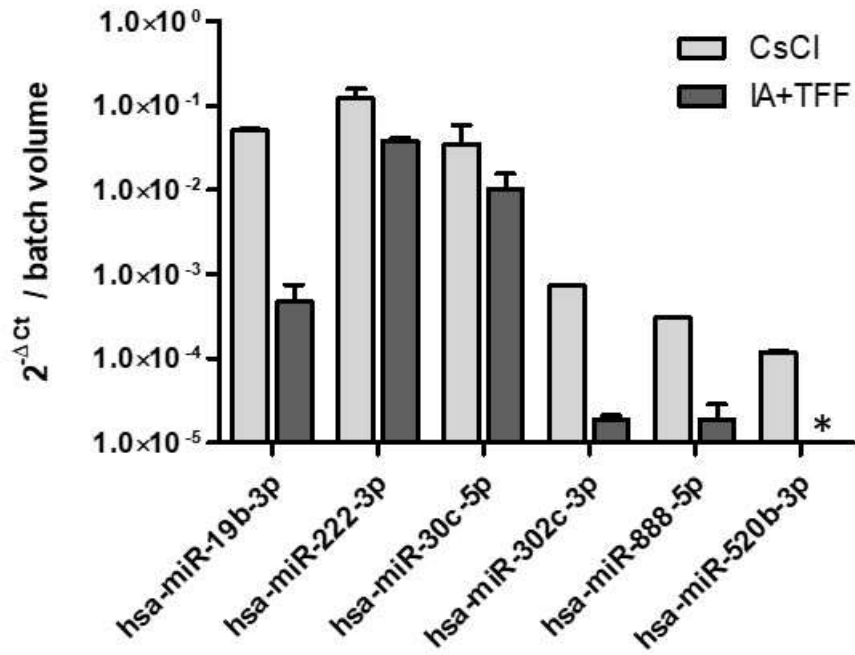

**Figure S4: Impact of the purification process on the residual miRNA content.** A 5-L bulk of AAV8 produced in Sf9 insect cells by dual-baculovirus infection was divided into two equal parts before purification by CsCl or IA-TFF. The asterisk indicates that Ct is below the qPCR threshold. The mean and standard deviation of two biological replicates are presented.

**Table S1: Quantification of miRNA in rAAV batches using the Qubit fluorometer.**

| Platform | Platform | Serotype | Fraction   | Purification | miRNA concentration (ng/μL) | Quantity of miRNA (ng) per 1E10 vg |
|----------|----------|----------|------------|--------------|-----------------------------|------------------------------------|
| Batch 17 | HEK293   | AAV8     | full       | CsCl         | 1.86                        | 3.2                                |
| Batch 18 | HEK293   | AAV8     | full+empty | IA           | 0.22                        | 0.8                                |
| Batch 19 | HEK293   | AAV8     | full       | CsCl         | 0.69                        | 0.5                                |
| Batch 20 | HEK293   | AAV8     | full+empty | IA           | 2.67                        | 2.9                                |
| Batch 21 | Sf9      | AAV8     | full       | CsCl         | 5.95                        | 5.4                                |
| Batch 22 | Sf9      | AAV8     | full       | CsCl         | 2.26                        | 3.7                                |
| Batch 23 | Sf9      | AAV8     | full+empty | IA           | 2.49                        | 9.6                                |

**Table S2: MicroRNAs selected for RT-qPCR quantification.**

| Cells (organism)                        | miRNA name        | miRBase accession number | miR Sequence 5' to 3'   |
|-----------------------------------------|-------------------|--------------------------|-------------------------|
| HEK293<br>( <i>Homo sapiens</i> )       | hsa-miR-19b-3p    | MIMAT0000074             | UGUGCAAUCCAUGCAAACUGA   |
|                                         | hsa-miR-222-3p    | MIMAT0000279             | AGCUACAUCUGGCUACUGGGU   |
|                                         | hsa-miR-30c-5p    | MIMAT0000244             | UGUAAACAUCCUACACUCUCAGC |
|                                         | hsa-miR-302c-3p   | MIMAT0000717             | UAAGUGCUUCCAUGUUUCAGUGG |
|                                         | hsa-miR-888-5p    | MIMAT0004916             | UACUCAAAAAGCUGUCAGUCA   |
|                                         | hsa-miR-520b-3p   | MIMAT0002843             | AAAGUGCUUCCUUUUAGAGGG   |
| Sf9<br>( <i>Spodoptera frugiperda</i> ) | hsa-miR-184       | MIMAT0000454             | UGGACGGAGAACUGAUAAAGGGU |
|                                         | sfr-miR-bantam-3p | na                       | UGAGAUCAUUGUGAAAGCUGAU  |
|                                         | hsa-miR-100-5p    | MIMAT0000098             | AACCCGUAGAUCCGAACUUGUG  |
|                                         | hsa-miR-10a-5p    | MIMAT0000253             | UACCCUGUAGAUCCGAAUUUGUG |
|                                         | hsa-let-7a-5p     | MIMAT0000062             | UGAGGUAGUAGGUUGUAUAGUU  |
|                                         | hsa-miR-33a-5p    | MIMAT0000091             | GUGCAUUGUAGUUGCAUUGCA   |

Sf9 miRNAs were selected from Mehrabadi *et al.* Gen Virol 2013. na: not applicable.

**Table S3: rAAV batches analyzed in the study.**

| Platform | Batch number | Bulk number | Serotype | Fraction   | Purification | vg/mL   | p/mL    | p/vg  |
|----------|--------------|-------------|----------|------------|--------------|---------|---------|-------|
| HEK293   | 1            | 6788        | AAV8     | full       | CsCl         | 2.1E+13 | 2.1E+13 | 1.0   |
|          | 2            | 6788        | AAV8     | empty      | CsCl         | 7.1E+10 | 5.0E+13 | 704.2 |
|          | 3            | 6789        | AAV2     | full       | CsCl         | 2.7E+12 | 5.1E+12 | 1.9   |
|          | 4            | 6789        | AAV2     | empty      | CsCl         | 3.0E+10 | 3.3E+12 | 110.0 |
|          | 5            | BACTRANS008 | AAV2     | full       | CsCl         | 3.8E+11 | 5.8E+11 | 1.6   |
|          | 6            | BACTRANS027 | AAV8     | full       | CsCl         | 2.6E+13 | 3.5E+13 | 1.3   |
|          | 7            | BACTRANS035 | AAV8     | full       | IA+CsCl      | 7.1E+12 | 6.1E+12 | 0.9   |
|          | 8            | BACTRANS035 | AAV8     | empty      | IA+CsCl      | 2.0E+10 | nd      | nd    |
|          | 9            | BACTRANS035 | AAV8     | full+empty | IA           | 7.7E+12 | 2.0E+13 | 2.6   |
|          | 17           | 6855        | AAV8     | full       | CsCl         | 5.9E+12 | nd      | nd    |
|          | 18           | 6855        | AAV8     | full+empty | IA           | 2.6E+12 | nd      | nd    |
|          | 19           | 6856        | AAV8     | full       | CsCl         | 1.5E+13 | nd      | nd    |
|          | 20           | 6856        | AAV8     | full+empty | IA           | 9.2E+12 | nd      | nd    |
| Sf9      | 10           | AAVBAC243   | AAV8     | full       | CsCl         | 1.8E+12 | 4.7E+12 | 2.6   |
|          | 11           | AAVBAC312   | AAV8     | full       | CsCl         | 7.9E+12 | 1.6E+13 | 2.0   |
|          | 12           | AAVBAC314   | AAV8     | full       | CsCl         | 8.9E+12 | 1.9E+13 | 2.1   |
|          | 13           | AAVBAC307   | AAV8     | full       | IA+CsCl      | 1.1E+13 | 2.6E+13 | 2.4   |
|          | 14           | AAVBAC307   | AAV8     | empty      | IA+CsCl      | 2.5E+11 | 5.5E+13 | 220.0 |
|          | 15           | AAVBAC307   | AAV8     | full+empty | IA           | 3.2E+13 | 1.7E+14 | 5.4   |
|          | 16           | AAVBAC313   | AAV2     | full       | CsCl         | 2.2E+12 | 6.9E+12 | 3.1   |
|          | 21           | AAVBAC390   | AAV8     | full       | CsCl         | 1.1E+13 | nd      | nd    |
|          | 22           | AAVBAC391   | AAV8     | full       | CsCl         | 6.1E+12 | nd      | nd    |
|          | 23           | AAVBAC386   | AAV8     | full+empty | IA           | 2.6E+12 | nd      | nd    |

AAV vectors were generated with the CMV-eGFP-HBBpA cassette. The concentration in vector genome per mL (vg/mL) was determined by qPCR targeting ITRs. Capsid titer in particle per mL (p/mL) was determined by ELISA. nd: not determined.

**Table S4: Correlation analysis of the miRNA profiles for HEK293-derived AAV vectors.**

| $r^{(1)}$ | HEK293 | batch 1 | batch 2 | batch 3 | batch 4 | batch 5 | batch 6 | batch 7 | batch 8 | batch 9 |
|-----------|--------|---------|---------|---------|---------|---------|---------|---------|---------|---------|
| HEK293    | na     | na      | na      | na      | na      | na      | na      | na      | na      | na      |
| batch 1   | 0.95   | na      |
| batch 2   | 0.96   | 0.94    | na      |
| batch 3   | 0.20   | 0.38    | 0.04    | na      |
| batch 4   | 0.69   | 0.78    | 0.54    | 0.84    | na      | na      | na      | na      | na      | na      |
| batch 5   | 0.23   | 0.43    | 0.10    | 0.99    | 0.85    | na      | na      | na      | na      | na      |
| batch 6   | 0.23   | 0.51    | 0.18    | 0.99    | 0.90    | 0.99    | na      | na      | na      | na      |
| batch 7   | 0.78   | 0.86    | 0.65    | 0.76    | 0.99    | 0.77    | 0.83    | na      | na      | na      |
| batch 8   | 0.99   | 0.98    | 0.95    | 0.29    | 0.76    | 0.33    | 0.42    | 0.84    | na      | na      |
| batch 9   | 0.41   | 0.55    | 0.24    | 0.97    | 0.94    | 0.96    | 0.98    | 0.89    | 0.50    | na      |

<sup>(1)</sup> The Pearson correlation coefficient  $r$  was calculated from RT-qPCR data for the 6 selected miRNAs.

**Table S5: Correlation analysis of the miRNA profiles for Sf9-derived AAV vectors.**

| $r^{(1)}$ | Sf9  | batch 10 | batch 11 | batch 12 | batch 13 | batch 14 | batch 15 | batch 16 |
|-----------|------|----------|----------|----------|----------|----------|----------|----------|
| Sf9       | na   | na       | na       | na       | na       | na       | na       | na       |
| batch 10  | 0.63 | na       |
| batch 11  | 0.75 | 0.98     | na       | na       | na       | na       | na       | na       |
| batch 12  | 0.62 | 0.94     | 0.96     | na       | na       | na       | na       | na       |
| batch 13  | 0.67 | 1.00     | 0.99     | 0.95     | na       | na       | na       | na       |
| batch 14  | 0.67 | 1.00     | 0.99     | 0.95     | 1.00     | na       | na       | na       |
| batch 15  | 0.64 | 1.00     | 0.99     | 0.95     | 1.00     | 1.00     | na       | na       |
| batch 16  | 0.84 | 0.94     | 0.99     | 0.93     | 0.96     | 0.96     | 0.95     | na       |

<sup>(1)</sup> The Pearson correlation coefficient  $r$  was calculated from RT-qPCR data for the 6 selected miRNAs.
