# Supplementary material for: Characterization of residual microRNAs in AAV vector batches produced in HEK293 mammalian cells and Sf9 insect cells
Source: PubMed Central journal article supplement — Mol Ther Methods Clin Dev. 2024 Jul 25;32(3):101305. doi: 10.1016/j.omtm.2024.101305 (PMC11365364; doi:10.1016/j.omtm.2024.101305), 2024-07-25
Supplement: mmc2.pdf [file mmc2.pdf]

# Characterization of residual microRNAs in AAV vector batches produced in HEK293 mammalian cells and Sf9 insect cells

Magalie Penaud-Budloo,<sup>1</sup> Emilie Lecomte,<sup>1</sup> Quentin Lecomte,<sup>1</sup> Simon Pacouret,<sup>1</sup> Frédéric Broucq,<sup>1</sup> Aurélien Guy-Duché,<sup>1</sup> Jean-Baptiste Dupont,<sup>1</sup> Laurence Jeanson-Leh,<sup>2</sup> Cécile Robin,<sup>1</sup> Véronique Blouin,<sup>1</sup> Eduard Ayuso,<sup>1,3</sup> and Oumeya Adjali<sup>1,3</sup>

<sup>1</sup>Nantes Université, CHU Nantes, INSERM, TARGET, 44000 Nantes, France; <sup>2</sup>Genethon, 91100 Evry, France

**With more than 130 clinical trials and 8 approved gene therapy products, adeno-associated virus (AAV) stands as one of the most popular vehicles to deliver therapeutic DNA *in vivo*. One critical quality attribute analyzed in AAV batches is the presence of residual DNA, as it could pose genotoxic risks or induce immune responses. Surprisingly, the presence of small cell-derived RNAs, such as microRNAs (miRNAs), has not been investigated previously. In this study, we examined the presence of miRNAs in purified AAV batches produced in mammalian or in insect cells. Our findings revealed that miRNAs were present in all batches, regardless of the production cell line or capsid serotype (2 and 8). Quantitative assays indicated that miRNAs were co-purified with the recombinant AAV particles in a proportion correlated with their abundance in the production cells. The level of residual miRNAs was reduced via an immunoaffinity chromatography purification process including a tangential flow filtration step or by RNase treatment, suggesting that most miRNA contaminants are likely non-encapsidated. In summary, we demonstrate, for the first time, that miRNAs are co-purified with AAV particles. Further investigations are required to determine whether these miRNAs could interfere with the safety or efficacy of AAV-mediated gene therapy.**

## INTRODUCTION

Advanced therapy medicinal products (ATMPs) have revolutionized medicine, providing curative treatments for previously incurable diseases such as genetic disorders. Based on engineering of nucleic acids, viruses, cells, or tissues, ATMPs are the fruit of decades of research and development. The corollary is that these new drugs are more complex to characterize compared with chemicals or recombinant proteins. One of the most popular viruses used for human gene therapy is the adeno-associated virus (AAV). Long regarded as poorly immunogenic, recent severe adverse events and deaths in clinical trials have raised concerns about immune response to these products.<sup>1–3</sup> Despite the market authorization of eight AAV-derived drugs worldwide,<sup>4</sup> greater efforts are needed regarding the characterization of AAV vectors. A recombinant AAV (rAAV)

contains a single-stranded therapeutic DNA molecule protected by an icosahedral capsid. Either produced in mammalian or in insect cells, purified rAAV can contain various process- and product-related impurities.<sup>5</sup> Among those, nucleic acids can come from the cell line (host cell DNA), the vector or helper plasmids, the recombinant baculovirus, or the helper viruses used for AAV production. The presence of residual DNA poses risks of oncogenicity and immunogenicity.<sup>6</sup> Therefore, DNA impurities must be specifically identified, quantified, and minimized.<sup>7,8</sup> While residual DNA external to the capsids can be more easily removed through DNase treatment<sup>9</sup> or alternative purification steps, unwanted encapsidated DNA is more challenging to eliminate. Remarkably, the presence of small cell-derived RNAs, such as microRNAs (miRNAs), has never been investigated and no recommendation currently exists for controlling miRNA in rAAV products.<sup>10</sup> miRNAs are small non-coding RNA (ncRNA) molecules of 20–25 nucleotides that trigger translational repression and mRNA degradation. Involved in various biological processes, they are transferable from cell to cell and are highly stable, especially when associated with an Argonaute (Ago) protein. miRNA expression has been found to be dysregulated in cancer cells, with certain miRNAs, known as oncomirs, linked to specific oncogenic events. The most used cell line for AAV vector production is HEK293, a human embryonic kidney cell line transformed with human adenovirus serotype 5 sheared DNA. Like other immortalized cells, HEK293 have been shown to exhibit dysregulated and specific miRNA activity profiles.<sup>11</sup> However, whether AAV vectors produced in HEK293 cells are contaminated with cellular miRNAs remains unknown. In this study, research-grade AAV vector batches produced in mammalian cells (HEK293) or in insect cells (*Spodoptera frugiperda*, Sf9) were analyzed for the presence of miRNAs by reverse-transcription qPCR (RT-qPCR). Our findings indicate that miRNAs are enriched in rAAV batches

Received 27 February 2024; accepted 23 July 2024;  
<https://doi.org/10.1016/j.omtm.2024.101305>.

<sup>3</sup>These authors contributed equally

**Correspondence:** Magalie Penaud-Budloo, Nantes Université, CHU Nantes, INSERM, TARGET, 44000 Nantes, France.

**E-mail:** [magalipenaud@gmail.com](mailto:magalipenaud@gmail.com)

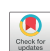

compared with other small RNAs (sRNAs) and are primarily external to the AAV capsids.

## RESULTS

### Residual miRNAs are present and enriched compared with other sRNAs in purified AAV vector batches

The presence of residual miRNA was investigated in AAV8 research-grade batches produced in either HEK293 mammalian cells or Sf9 insect cells. To account for variability introduced by the purification process, AAV vectors purified by CsCl-gradient ultracentrifugation (CsCl) or immunoaffinity chromatography (IA) were analyzed. After total RNA extraction, total miRNA concentration was measured by fluorescence using the Qubit microRNA assay kit. The concentration of miRNA in purified AAV8 batches ranges from 0.22 to 2.67 ng/ $\mu$ L ( $n = 4$ ) for the HEK293 platform and from 2.26 to 5.95 ng/ $\mu$ L in the Sf9 platform ( $n = 3$ ) (Table S1) which corresponds to 0.8 to 9.6 ng of residual miRNA per vector dose of  $1 \times 10^{10}$  vector genomes (vg). To further characterize the residual content of sRNA, automated electrophoresis was realized on an Agilent Small RNA chip. sRNAs include (1) the housekeeping transfer RNA (tRNA) of 76–90 nucleotides in length and the 5S and 5.8S ribosomal RNA (rRNA) of 120–121 and 156 nucleotides, respectively, as well as (2) the regulatory ncRNA, including miRNAs of 26–31 bases in size. The sRNA profile of HEK293 cells (Figure 1A) or Sf9 cells (Figure 1C) was compared with the electropherograms obtained for AAV vectors (Figures 1B and 1D). rAAV batches contain miRNA, tRNA, and rRNA. miRNAs constitute 18.0% to 59.5% of sRNA in rAAV, whereas miRNAs represent 3.6% to 16.7% of cellular sRNA content (Table 1). In conclusion, miRNAs were co-purified with AAV vectors and were found at quantifiable amount in all batches analyzed. Since miRNAs are more stable than other sRNAs, it could explain the fact that they are overrepresented in final stocks and resist better the purification process.

### Quantification of selected miRNA in AAV vectors produced in HEK293 cells using RT-qPCR

To examine the origin of contaminating miRNA and the impact of purification parameters on their residual level, we selected six miRNAs that are expressed in mammalian cells<sup>12,13</sup> (Table S2). Three miRNAs are abundant in HEK293 producing cells: hsa-miR-19b-3p, hsa-miR-222-3p, and hsa-miR-30c-5p. Three miRNAs are expressed at low level in HEK293: hsa-miR-302c-3p, hsa-miR-888-5p, and hsa-miR-520b-3p. For more biological relevance, the selection was additionally made on the following criteria: one miRNA per cluster, the available primers are specific to the miRNA, the miRNA is expressed in a broad spectrum of tissues and involved in oncogenesis or cell proliferation. Each miRNA was quantified by RT-qPCR in HEK293 cells and in nine rAAV batches purified by CsCl (Figure 2). Titers of full AAV vectors purified by CsCl or IA range from  $3.8 \times 10^{11}$  to  $2.6 \times 10^{13}$  vg/mL (Table S3), with vector purity between 73.7% and 100% (Figure S1). The relative miRNA quantity was determined using the  $\Delta$ Ct method thanks to the Cel-miR-39 spike-in control (SIC). To compare batches, data were normalized to the culture volume and the final volume of the purified lot. Overall, the miRNA expression profile in rAAV correlates

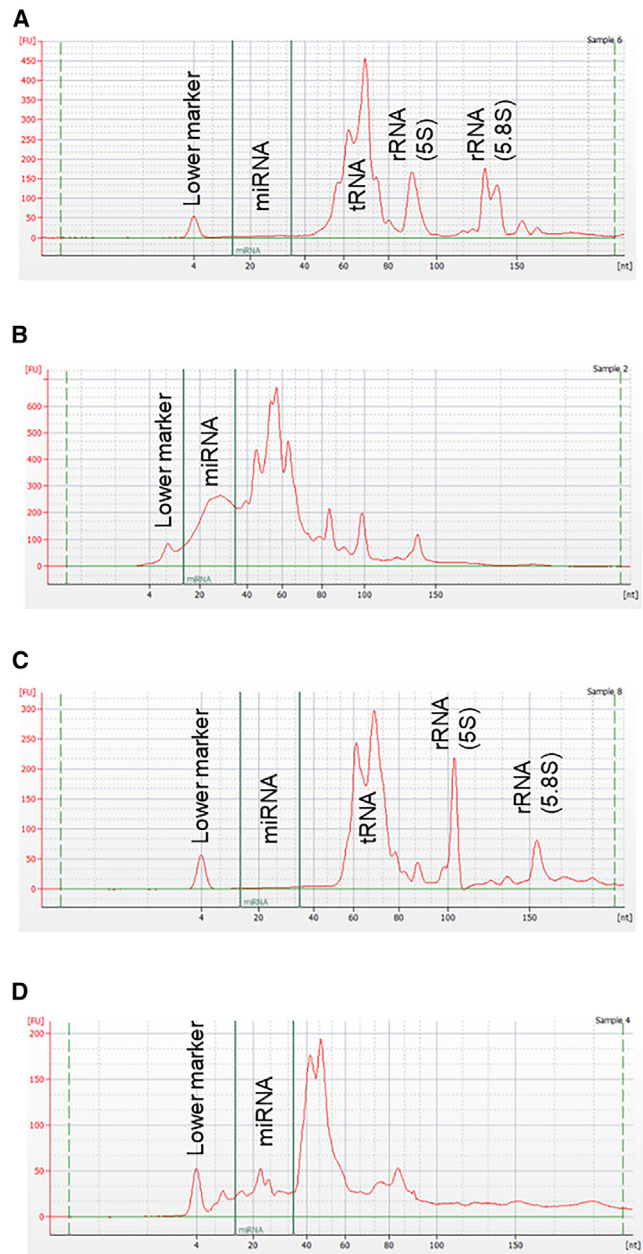

**Figure 1. Small RNA content of AAV vector batches**

Total RNA was extracted from HEK293 mammalian cells (A), HEK293-derived rAAV (batch 17) (B), Sf9 insect cells (C), and Sf9-derived rAAV (batch 21) (D). AAV8-GFP vectors (shown in B and D) were purified by CsCl density gradient ultracentrifugation. Electropherograms were obtained after capillary electrophoresis on an Agilent Small RNA chip (6–150 nucleotides) with the miRNA region set to the range 15–35 nucleotides (area between the two green lines). miRNA, microRNA; tRNA, transfer RNA; rRNA, ribosomal RNA. The scale of the x axis is displayed in nucleotides [nt], and the y axis represents fluorescence units [FU].

with those of HEK293. Noteworthy, miR-19b, a miRNA belonging to the oncomiR-1 cluster, is one of the most represented miRNAs found in HEK293-derived vectors.

**Table 1. Proportion of miRNA among sRNAs**

| Cell platform | Sample                | miRNA/sRNA (%) |
|---------------|-----------------------|----------------|
| HEK293        | cells ( <i>n</i> = 5) | 4.3–16.7       |
|               | rAAV ( <i>n</i> = 6)  | 18.0–59.5      |
| Sf9           | cells ( <i>n</i> = 4) | 3.6–9.6        |
|               | rAAV ( <i>n</i> = 5)  | 24.5–36.8      |

AAV-CMV-eGFP batches were produced in HEK293 and Sf9 cells at small scale (400 mL to 1 L) and purified by double CsCl gradient ultracentrifugation. The percentage of miRNAs (15–35 nucleotides) to sRNAs (0–280 nucleotides) was determined after resolution by automated electrophoresis on an Agilent Small RNA chip.

To determine if the vector genome had an impact on the degree of residual miRNA, empty and full fractions of a same bulk were purified by CsCl density gradient ultracentrifugation. The overall profiles of full and empty capsids are similar (Figure 2), except for empty AAV8 (batch 2), which presents a higher level of residual miRNA. Moreover, we analyzed the impact of the AAV serotype in the quantification of residual miRNAs and found that the relative quantity of miRNA was equivalent for AAV2 (batches 3 and 5) and AAV8 (batches 1 and 6), showing a low lot-to-lot variability. Indeed, the profiles of the six selected miRNAs were well correlated (Table S4), irrespective of the vector type. In conclusion, the amount of miRNA is independent of the particle type (full vs. empty) and capsid serotype (2 vs. 8).

#### Quantification of selected miRNA in AAV vectors batches produced in Sf9 cells

Akin to the study performed with vectors derived from HEK293 cells, for Sf9-derived vectors, six miRNAs expressed in *Bombyx mori* caterpillar were selected for RT-qPCR. Based on Mehrabadi et al.'s publication about the microRNAome of *Spodoptera frugiperda* cells,<sup>14</sup> we selected three highly expressed and three weakly expressed miRNAs in Sf insect cells. Referring to miRBase, these miRNAs show a perfect homology to human miRNAs with a conserved preferred strand, except for miR-10a with a 1 base shift compared with human miR and miR-bantam, which lacks a human counterpart. Of note, miR-bantam and miR-184 represent around 65% of all the miRNAs found in Sf9 cells.<sup>14</sup> The different batches analyzed by RT-qPCR are listed in Table S3. Titer of full AAV vectors purified by CsCl or IA range from  $1.8 \times 10^{12}$  to  $3.2 \times 10^{13}$  vg/mL (Table S3), with vector purity between 56.1% and 84.7% (Figure S2). Again, miRNA abundance in rAAV batches correlates with the proportion of each miRNA in Sf9 cells (Figure 3A). The capsid serotype, purification process, and particle type do not modify the general miRNA profile as shown by the Pearson correlation coefficient  $R^2 \geq 0.93$  (Table S5).

#### Residual miRNAs are representative of the cellular miRNA content

To confirm the correlation between miRNA profiles in rAAV and in producing cells, a TaqMan low-density array (TLDA) analysis was realized for AAV8 vectors, allowing a precise quantification of the 754 human miRNAs (Figure 4A). The results are in accordance

with RT-qPCR data. Among the top ten more expressed miRNAs in HEK293 cells, four were previously selected for RT-qPCR analysis, which is in good agreement with our selection criteria (Table 2). With an  $R^2$  of 0.78 (Figure 4B), it demonstrates that the AAV miRNA profile correlates with miRNA abundance in the producing cell line.

In cells, miRNAs are often associated with Ago proteins. Ago-2 was detected by western blot in a unique AAV batch that corresponds to AAV8 empty capsids (Figure S3, lane 4). The presence of Ago-2 proteins is related to a poor purity of the empty CsCl fraction. Indeed, miRNA quantity was approximately 2 logs higher in the empty fraction than in the full fraction purified from the same bulk (Figures 2B and 2C, batch 1 compared with batch 2). Furthermore, the percentage of purity of batch 2 is low (76%) with a band above VP1 on the SDS-PAGE gel (Figure S1, lane 5).

MicroRNAs are also known to be selectively packaged, secreted, and transferred between cells in exosomes. No exosome was detected by an anti-CD63 western blot in the purified AAV batches (data not shown), suggesting that miRNAs are not embedded into exosomes.

#### A significant proportion of miRNAs is external to AAV capsids

A filtration assay was developed to determine if residual RNAs are encapsidated into the AAV particles or are external to the capsids (Figure 5). AAV samples were loaded onto a centrifugal filter of 100 kDa MWCO usually used to concentrate AAV vectors. The rationale for the assay is the assumption that miRNA encapsidated into the capsids will be retained in the concentrated (C) fraction with AAV particles, while those external to the capsid will go in the flowthrough (FT) fraction. The filter capacity to retain AAV particles was confirmed by qPCR showing the same total vector genome copy number before and after concentration (Figures 5A and 5C). The three most abundant miRNAs were then quantified by RT-qPCR in the C and the FT fractions. For the AAV8 batch produced in HEK293, miRNA concentrations in FT represent 68%–80% of total residual miRNA (Figure 5B). Taking into consideration that FT corresponds to 61% of the total volume (FT + C) after centrifugation, these data are consistent with a passive filtration of free miRNA. For Sf9-derived AAV8, miRNA concentrations in FT range between 12% and 21% of the total residual miRNA (Figure 5D). The FT fraction volume corresponding to 51% of the total volume, a substantial proportion of miRNA was retained in the C fraction, either as free or encapsidated miRNA. To better study miRNA distribution, a synthetic hsa-miR-19b mimic was spiked in the Sf9-derived AAV sample before concentration. Considering that miR-19b is not expressed in Sf9 cells, it was used as a control of free miRNA (external to the capsids). Like Sf9 endogenous miRNAs, a percentage of 11% of the spiked miR-19b was distributed in the FT, suggesting that a significant proportion of residual miRNAs is outside AAV capsids.

#### Immunoaffinity chromatography process and RNase treatment reduce residual miRNA level

A critical issue of vector safety is determining whether miRNAs can be effectively removed from AAV batches. For both production

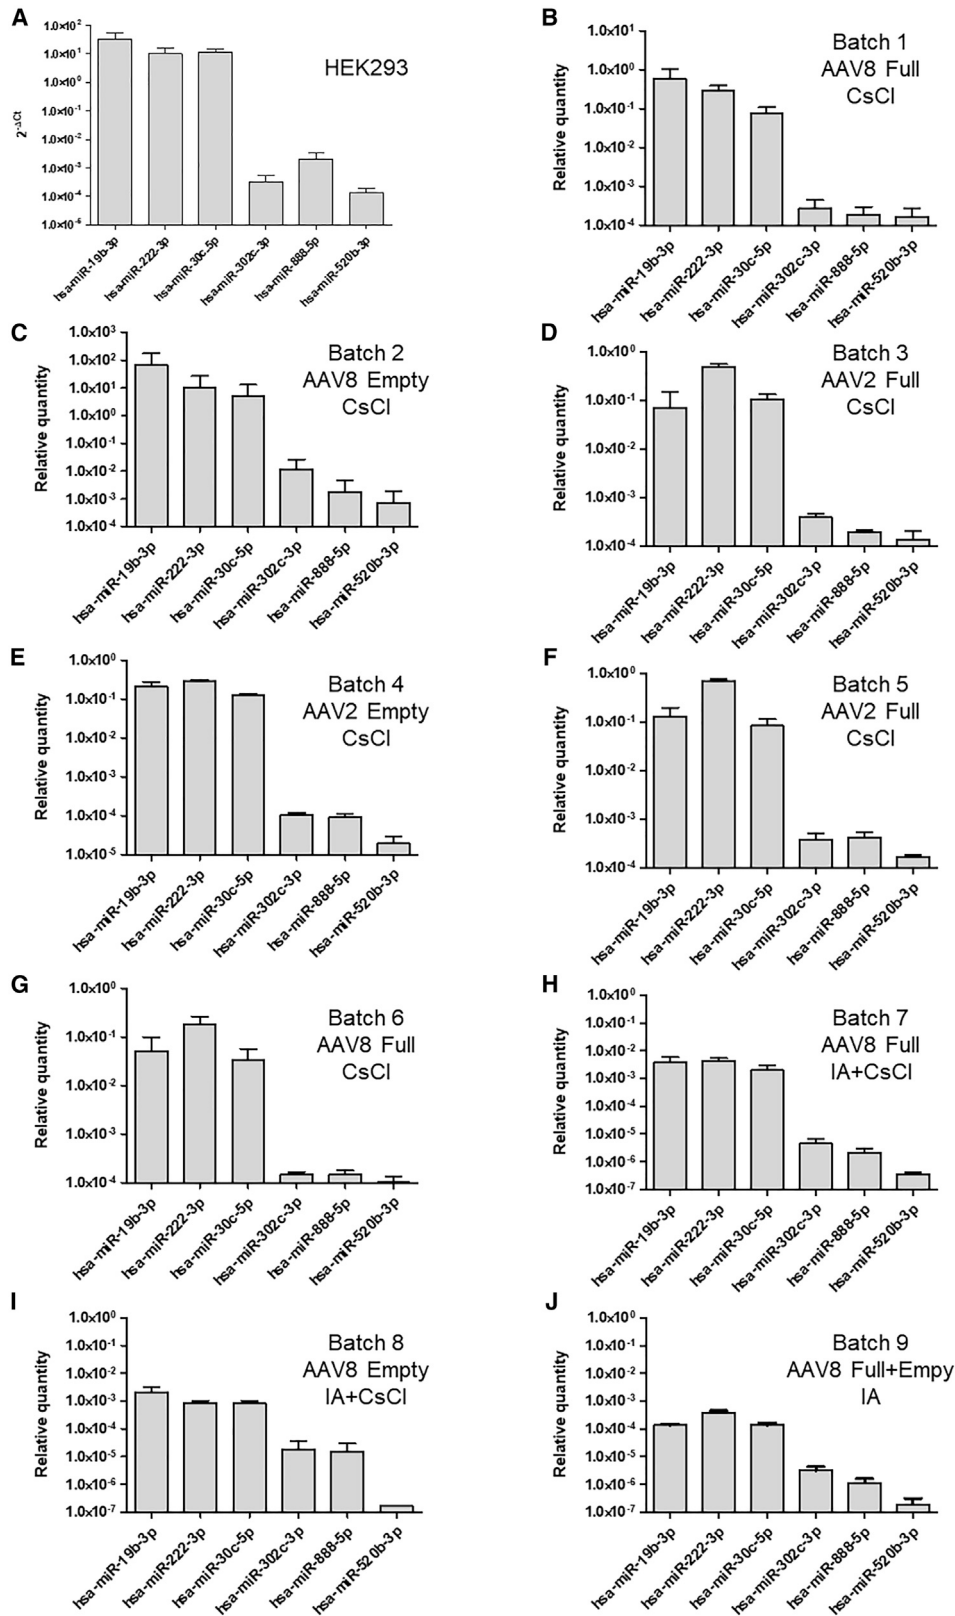

(legend on next page)



platforms, vectors purified by IA seems to contain less miRNAs than CsCl-purified rAAV (batches 8 and 9 on [Figure 2](#), batch 13 and 15 on [Figure 3A](#)). For a side-by-side comparison, AAV8 particles were purified from the same biomass either by IA or CsCl, and miRNAs were quantified by RT-qPCR. Using a process including an IA column followed by a tangential flow filtration (TFF), the amount of three miRNAs was reduced by approximately 100-fold, and to a lower extent for miR222 and miR-30c ([Figure S4](#)). We concluded that the chromatography process (IA + TFF) allows a better clearance of residual miRNAs than ultracentrifugation on CsCl gradients, which is also in agreement with previous experiments showing that residual miRNAs are mainly non-encapsidated.

A complementary option to reduce residual miRNA level could be to add an RNase digestion step as part of the purification process. Widely used for the removal of RNA from proteins and DNA preparations, RNase A and RNase T1 were tested on an AAV8-GFP lot produced in Sf9 cells and purified on density gradients. These two endonucleases hydrolyze single-stranded RNA with different sequence specificity. RNase A cleaves RNA after pyrimidine bases, whereas RNase T1 specifically degrades RNA at G residues. The RNase treatment was performed before capsid denaturation and miRNA extraction. The quantity of miR-184, abundant in Sf9, and of miR-19b mimic spike was checked by RT-qPCR before and after RNase digestion. Both miRNAs harbor several C, U, and G nucleotides ([Table S2](#)). A combined effect was observed for the control miR-19b level with a drastic drop of more than 5 logs ([Figure 6](#)). A treatment with RNase cocktail reduced the level of residual miRNA-184 by 2 logs. In conclusion, we established that IA purification and RNase treatment can be efficient in limiting residual miRNA levels in AAV batches.

## DISCUSSION

The purity of AAV vectors is paramount for both gene transfer efficiency and patient safety. While monitoring residual host cell DNA is mandatory, investigation into residual RNA has been lacking. However, RNA could serve as an immunostimulatory molecule within the innate immune system. In this study, we aimed to investigate the presence of miRNAs, known to be more stable than long mRNA molecules. Our data revealed the presence of residual miRNAs in purified AAV preparations at concentrations below 6 ng/ $\mu$ L, and the proportion of each miRNA correlated with the expression level of the production cells. These findings were confirmed in vector batches produced in human cells (HEK293) and in insect cells (Sf9), indicating a general observation rather than a phenomenon exclusive to one system. Since miRNAs act as post-transcriptional regulators of mRNA

targets, the primary risk associated with the inadvertent transfer of such sRNAs alongside AAV vectors is gene dysregulation. Among the miRNAs detected in AAV vector produced in the HEK293 cells, miR-19b<sup>15</sup> and miR-222<sup>16</sup> are two oncogenic miRNAs implicated in cell proliferation, miR-30c is involved in inflammation<sup>17</sup> and miR-888 is upregulated in hepatocellular carcinoma.<sup>18,19</sup> As miRNA expression profile vary depending on the production cell line,<sup>11</sup> it may be worthwhile to extend our investigation to other AAV production platforms utilizing HEK293T or HeLa cells.

In our study, miRNA concentration was slightly higher in Sf9-derived AAV vectors than in those produced with the HEK293 platform ([Table S1](#)). Considering the species specificity of miRNAs, it can be speculated that miRNAs originating from Sf9 insect cells might have less homology to human transcripts, potentially resulting in lower activity in humans. In addition, baculovirus infection of insect cells leads to suppression of cellular miRNAs, except for miR-184 and miR-10,<sup>14</sup> which could aid in reducing residual miRNA levels in the final AAV stocks. While baculoviruses derived from *Autographa californica* multiple nucleopolyhedrovirus (AcMNPV) are widely used for biomolecule production, the identification of the first baculovirus miRNA occurred only a decade ago.<sup>20</sup> Five miRNAs are encoded by AcMNPV, playing multiple roles in virus infection.<sup>21</sup> Based on the assumption that these miRNAs will not bind to human target transcripts, the presence of baculovirus miRNAs was not explored.

As a general principle, reducing the amount of residual miRNA in purified batches can mitigate the risk of inadvertent transfer and subsequent modification of gene expression in patients. Our results demonstrate that most residual miRNAs are external to AAV capsids and susceptible to RNase digestion and/or removal by purification methods such as chromatography and TFF. This study has examined research-grade vector stocks with varying degrees of purity. In contrast, for clinical studies, vector manufacturing protocols include more stringent purification steps that might contribute to reduce residual miRNAs. Indeed, purification of AAV vectors according to current good manufacturing practices involves treating the bulk harvest with nucleases capable of degrading DNA and RNA, as well as multiple steps of depth filtration, TFF, and sterile filtration. In addition, immunoaffinity columns are commonly used as a primary capture step, typically followed by ion-exchange chromatography as a polishing strategy.

In summary, our data demonstrate, for the first time, the presence of residual miRNAs in purified AAV batches. Although further

### Figure 2. Quantification of miRNAs in HEK293-derived AAV vector batches

miRNAs were quantified by RT-qPCR in HEK293 cell extract (A) and in AAV vector batches produced in HEK293 mammalian cells (B–J). AAV8 full (B) and empty (C) particles were purified by CsCl, as well as AAV2 full (D) and empty (E) particles. Quantification was performed from duplicate lots of full AAV2 (F) and full AAV8 (G) purified by CsCl. AAV8 full (H) and empty (I) particles were purified from the same bulk by IA followed by CsCl gradient ultracentrifugation. Batch 9 corresponds to an AAV8 purified by IA (J). The same cassette (cytomegalovirus [CMV] promoter and enhanced green fluorescent protein [eGFP] transgene) was used for all AAV vectors. MicroRNAs were extracted in triplicate and quantified in duplicate by SYBR Green-based RT-qPCR. The relative quantity of each miRNA was determined using the  $\Delta$ Ct method. For AAV, data were normalized to account for culture and batch volumes.

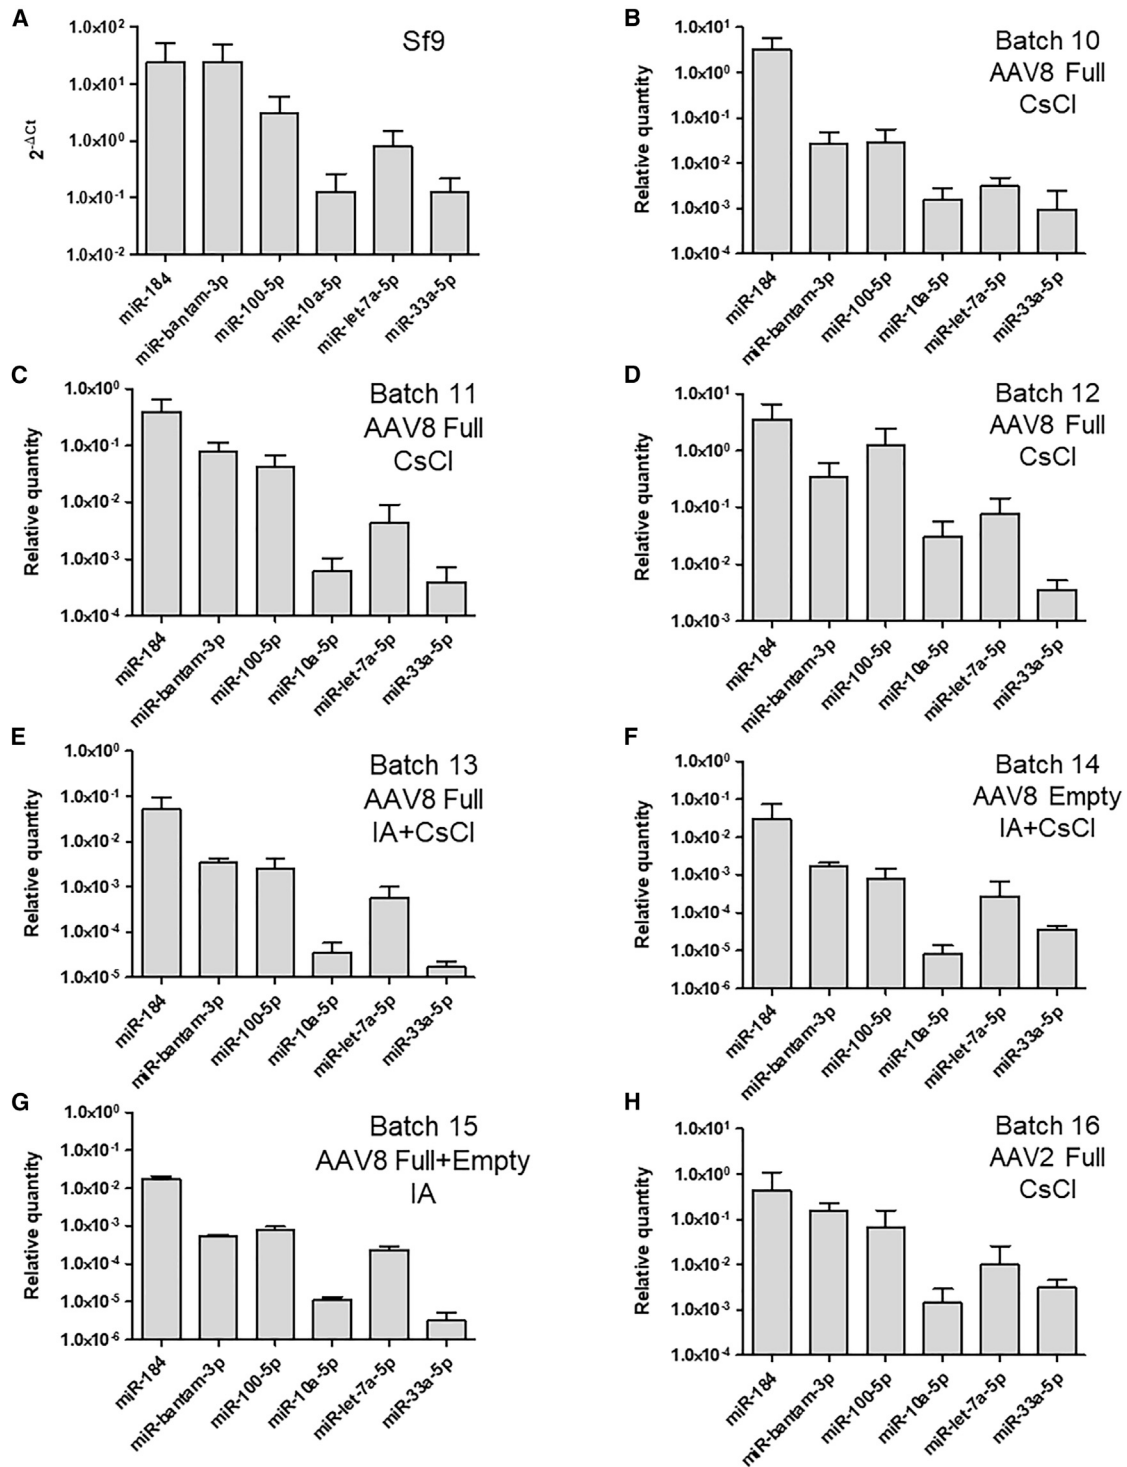

**Figure 3. Quantification of miRNAs in Sf9-derived AAV vector batches**

MiRNAs were quantified by RT-qPCR from Sf9 cell extract (A) and in rAAV produced in Sf9 insect cells (B–H). Three batches of AAV8-GFP (B–D) and one batch of AAV2-GFP (H) purified by CsCl were tested. AAV8 full (E) and empty (F) particles were purified from the same bulk by IA followed by CsCl gradient ultracentrifugation. Batch 15 corresponds to an AAV8 purified by IA (G). The same cassette (CMV-eGFP) was used for all AAV vectors. MicroRNAs were extracted in triplicate and quantified in duplicate by SYBR Green-based RT-qPCR. The relative quantity of each miRNA was calculated using the  $\Delta C_t$  method. For AAV, data were normalized to account for culture and batch volumes.

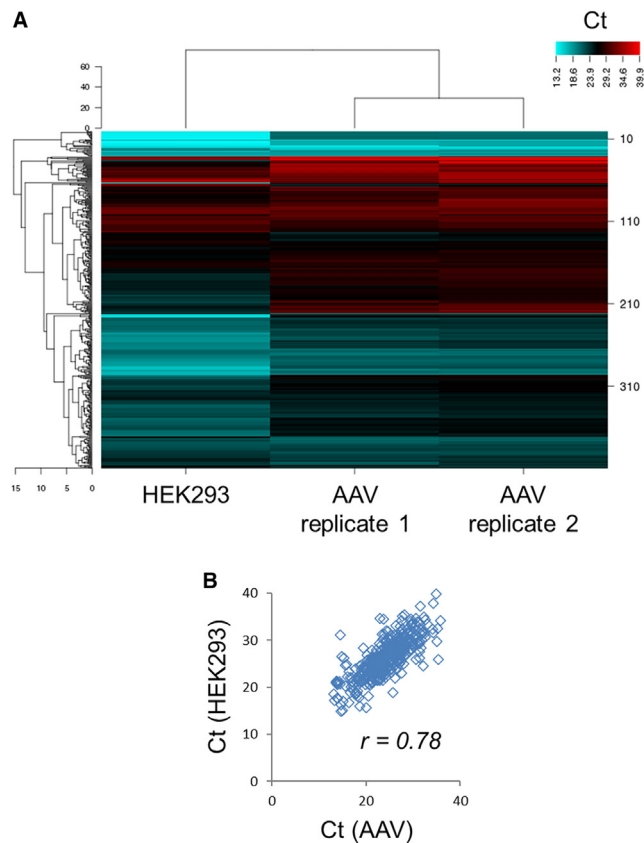

**Figure 4. Comparison of miRNA content in HEK293-producing cells and AAV vector by TLDA**

Human miRNAs were quantified in HEK293 cells and an AAV8 vector batch ( $n = 2$ ). AAV particles were purified by CsCl gradient ultracentrifugation. Results are represented as a heatmap (A) and a Ct correlation graph (B).

investigations are necessary to determine whether these sRNAs can be transferred to targeted tissues and taken up by cells *in vivo*, it is prudent to explore this phenomenon on a broader scale and including the analysis of clinically relevant AAV batches.

## MATERIALS AND METHODS

### Plasmid constructs and recombinant baculoviruses

AAV and helper plasmids used for the production of recombinant AAV2/2 and 2/8 in mammalian and insect cells are described by Penaud-Budloo et al.<sup>22</sup> In brief, the donor plasmid pFB-GFP contains a reporter cassette of 3.3 kbp composed of the human cytomegalovirus promoter, the enhanced green fluorescent protein (*eGFP*) reporter gene, and the 3' untranslated region of the human hemoglobin b gene, flanked by pSub201-derived floppable ITRs. The plasmid pFB-GFP was verified by Sanger sequencing and subsequently used either for transfection of HEK293 cells or for the generation of the baculovirus expression vector BEV-GFP as described in Penaud-Budloo et al.<sup>22</sup> The stability of the BEV stocks was validated through ten serial passages by real-time PCR and the identity of the P2 stocks was verified by Sanger sequencing.<sup>23</sup> The infectious

unit (IU) titer or the recombinant baculovirus batches was determined by cell size assay.<sup>23</sup>

### AAV vector production, purification, and quality control

To produce rAAV2/2 and AAV2/8 in mammalian cells, HEK293 cells were cotransfected with the pDP2 or pDP8 helper plasmid, respectively, and the pFB-GFP vector plasmid. More precisely, HEK293 cells at 70%–80% confluence were cotransfected with 550  $\mu$ g of helper plasmid and 275  $\mu$ g of vector plasmid per CellSTACK 5 culture chambers (Corning Life Sciences) following the calcium phosphate precipitation method. Six hours post-transfection, the culture medium was replaced by DMEM with 1% penicillin/streptomycin without FBS. For AAV2 vectors, cells and culture supernatant were recovered 72 h after transfection and treated with 1% Triton X-100 (Sigma-Aldrich) for 1 h at 37°C and 1 U/mL of Benzonase (Merck) for an additional 1 h at 37°C. For AAV8 vectors, the supernatant was recovered 96 h after transfection. AAV2 and AAV8 particles were polyethylene glycol precipitated overnight. After centrifugation, the pellet was resuspended in TBS and treated with 25 U/mL of Benzonase for 1 h at 37°C.

For AAV vector production in insect cells, *Spodoptera frugiperda* Sf9 cells from Thermo Fisher Scientific were grown at 27°C in Sf-900 III SFM in spinner flasks or 2-L bioreactors (Sartorius Biostat B). Sf9 cells were infected at a density of  $1 \times 10^6$  cells/mL with two baculoviruses: the recombinant BEV-GFP harboring the AAV vector genome and the BEV-rep2cap2 or BEV-rep2Cap8 for serotype 2 or 8 production, respectively. Each BEV was added to the cells at a multiplicity of infection of 1 IU per baculovirus. 96 h after infection, cells were lysed by the addition of 0.5% Triton X-100 (Sigma-Aldrich) for 2.5 h at 27°C. The crude bulk was clarified by centrifugation for 5 min at  $1,000 \times g$  or by depth filtration using Opticap disposable capsule filters (Merck Millipore) if the bulk volume was  $\geq 2$  L.

After clarification, recombinant AAV particles were purified either by (1) double CsCl density gradient ultracentrifugation as described in Ayuso et al.<sup>24</sup> (CsCl), (2) IA, or (3) IA followed by one round of CsCl gradient ultracentrifugation (IA + CsCl). Full and empty particles were recovered separately from the first CsCl gradient. The IA process consists of a purification step on a POROS CaptureSelect AAV8 high-performance affinity resin (Thermo Fisher Scientific) followed by TFF using a MidiKros 100-kDa mPES hollow fiber filter (Repligen). AAV vectors were finally formulated in Dulbecco's phosphate-buffered saline (Lonza) containing  $\text{Ca}^{2+}$  and  $\text{Mg}^{2+}$ , and 0.001% Pluronic F-68 (Sigma-Aldrich) for IA-purified batches.

The vg titer of the purified rAAV batches was determined by real-time PCR targeting the GFP transgene. To remove DNA contaminants external to the capsids, 3  $\mu$ L of rAAV stock was pretreated with 20 U of DNase I (Roche) in a total volume of 200  $\mu$ L of DNase reaction buffer (13 mM Tris [pH 7.5], 0.12 mM  $\text{CaCl}_2$ , 5 mM  $\text{MgCl}_2$ ) for 45 min at 37°C. DNA was then extracted using the High Pure Viral Nucleic Acid kit (Roche) and the vg copy number was determined using

**Table 2. List of the most abundant miRNAs expressed in HEK293 cells and quantification in derived AAV batch as determined by TLDA**

| Name                      | HEK293<br>Ct | AAV8 (n = 2)<br>Ct |
|---------------------------|--------------|--------------------|
| hsa-miR-17                | 12.3         | 15.9               |
| hsa-miR-106a              | 12.8         | 16.4               |
| hsa-miR-19b <sup>a</sup>  | 12.8         | 16.7               |
| hsa-miR-20a               | 13.7         | 17.3               |
| hsa-miR-520b <sup>a</sup> | 14.9         | 15.1               |
| hsa-miR-222 <sup>a</sup>  | 15.1         | 17.1               |
| hsa-miR-302c <sup>a</sup> | 15.1         | 15.1               |
| hsa-miR-221               | 16.4         | 18.6               |
| hsa-miR-34a               | 18.1         | 18.7               |
| hsa-miR-520f              | 18.3         | 15.6               |

<sup>a</sup>miRNA selected for RT-qPCR.

the following primers and probe: GFP For 5'-AGTCCGCCCTGAGCA AAGA-3', GFP Rev 5'-GCGGTCACGAACTCCAGC-3', and GFP probe 5'-FAM-CAACGAGAAGCGCGATCACATGGTC-TAMRA-3'. Total particle titers were determined by ELISA using the AAV8 titration enzyme-linked immunosorbent assay kit (Progen Biotechnik) following the manufacturer's instructions.

Vector purity was evaluated by SDS-PAGE followed by silver staining using the PlusOne silver staining kit (GE Healthcare Life Sciences). The percentage of AAV VP proteins to total proteins was determined with GeneTools software (Syngene).

Finally, the proportion of empty and full particles was calculated from analytical ultracentrifugation data. Sedimentation velocity experiments were performed as described by Saleun et al.<sup>25</sup>

#### miRNA isolation

Total RNA, including miRNAs, was extracted from HEK293 and Sf9 cells in triplicate using the miRNeasy mini kit (QIAGEN). In brief, a pellet of  $1 \times 10^6$  cells was resuspended in 20  $\mu$ L of phosphate-buffered saline 1 $\times$  and in 700  $\mu$ L of QIAzol by vortexing for 1 min. After 5 min incubation at room temperature, 3.5  $\mu$ L of miRNeasy serum/plasma SIC (QIAGEN) that was previously diluted at  $1.6 \times 10^8$  copies/ $\mu$ L in RNase-free water was added to the mix. The synthetic SIC corresponds to a *C. elegans* miR-39 miRNA mimic and was used for RT-qPCR normalization. After homogenization, 140  $\mu$ L of chloroform was added and extraction steps were realized following the manual instructions. Elution from an RNeasy Mini Spin column was performed with 14  $\mu$ L of RNase-free water and extracted RNA was stored at  $-80^\circ\text{C}$  before analysis.

For AAV vectors, miRNAs were extracted in triplicate using the miRNeasy Serum/Plasma kit (QIAGEN) following the manufacturer's instructions. In brief, 1 mL of QIAzol were added to 200  $\mu$ L of purified AAV. After vortexing and 5 min incubation at room temperature,

3.5  $\mu$ L of miRNeasy serum/plasma SIC (QIAGEN) diluted at  $1.6 \times 10^8$  copies/ $\mu$ L were added to the mix. After homogenization by inversion, 200  $\mu$ L of chloroform was added and extraction steps were realized using the RNeasy MinElute Spin columns following the manual instructions. The elution step was realized in 14  $\mu$ L of RNase-free water. Extracted miRNAs were stored at  $-80^\circ\text{C}$  before subsequent steps.

#### Quantification and characterization of total residual miRNAs

After miRNA extraction, miRNA concentration of each AAV sample was determined from three biological replicates and two measurements per replicate with the Qubit 4 Fluorometer (Thermo Fisher Scientific) using the Qubit miRNA assay kit (Thermo Fisher Scientific). In addition, the sRNA profile was visualized by automated electrophoresis on the 2100 Bioanalyzer instrument (Agilent) using the Small RNA chip (Agilent). Cellular extracts were diluted at 40 ng/ $\mu$ L before analysis. Electropherograms were analyzed with the 2100 Expert software (Agilent). The percentage of miRNAs (15–35 nucleotides) to sRNAs (0–280 nucleotides) was automatically calculated from concentrations in pg/ $\mu$ L.

#### Quantification of selected miRNAs by RT-qPCR

Selected miRNAs listed in Table S2 were quantified by RT-qPCR. Reverse transcription of mature miRNAs was realized from 10  $\mu$ L of RNA extract using the miScript II RT kit with HiSpec buffer (QIAGEN). Complementary DNA was generated following the manual instructions after 1 h incubation at  $37^\circ\text{C}$  and 5 min inactivation at  $95^\circ\text{C}$  in the GeneAmp PCR System 9700 thermocycler (Thermo Fisher Scientific). Negative controls were included by replacing the MiScript RT mix by RNase-free water. Complementary DNAs were finally diluted 1:10 in RNase-free H<sub>2</sub>O and stored at  $-20^\circ\text{C}$ .

Each miRNA was then quantified from the cDNA, in duplicate, using the miScript SYBR Green PCR kit (QIAGEN), the miRNA-specific forward primer (miScript Primer Assay, QIAGEN) and the reverse primer (miScript Universal Primer, QIAGEN) targeting the universal tag of the oligo-dT primer. Cycling conditions used for real-time PCR on the StepOne Plus real-time PCR system (Thermo Fisher Scientific, Applied Biosystems) were in accordance with the kit technical specifications. Before analysis, the  $\Delta R_n$  threshold was established at 0.2 for all qPCR assays. Data were normalized to the Cel-miR-39 SIC and the relative quantity of each miRNA was determined using the  $\Delta C_t$  method with the following formulae:

$$\text{For cells: } 2e^{-(C_t \text{ target} - C_t \text{ miR39 spike})}$$

$$\text{For AAV: } 2e^{-(C_t \text{ target} - C_t \text{ miR39 spike})} \times \text{batch volume} \div \text{culture volume}$$

#### TLDA analysis

Total RNA was reverse transcribed with the Megaplex Primer Pools A and B, or A only (human version 3), and miRNAs were quantified with the TaqMan Array Human MicroRNA Cards A and B set



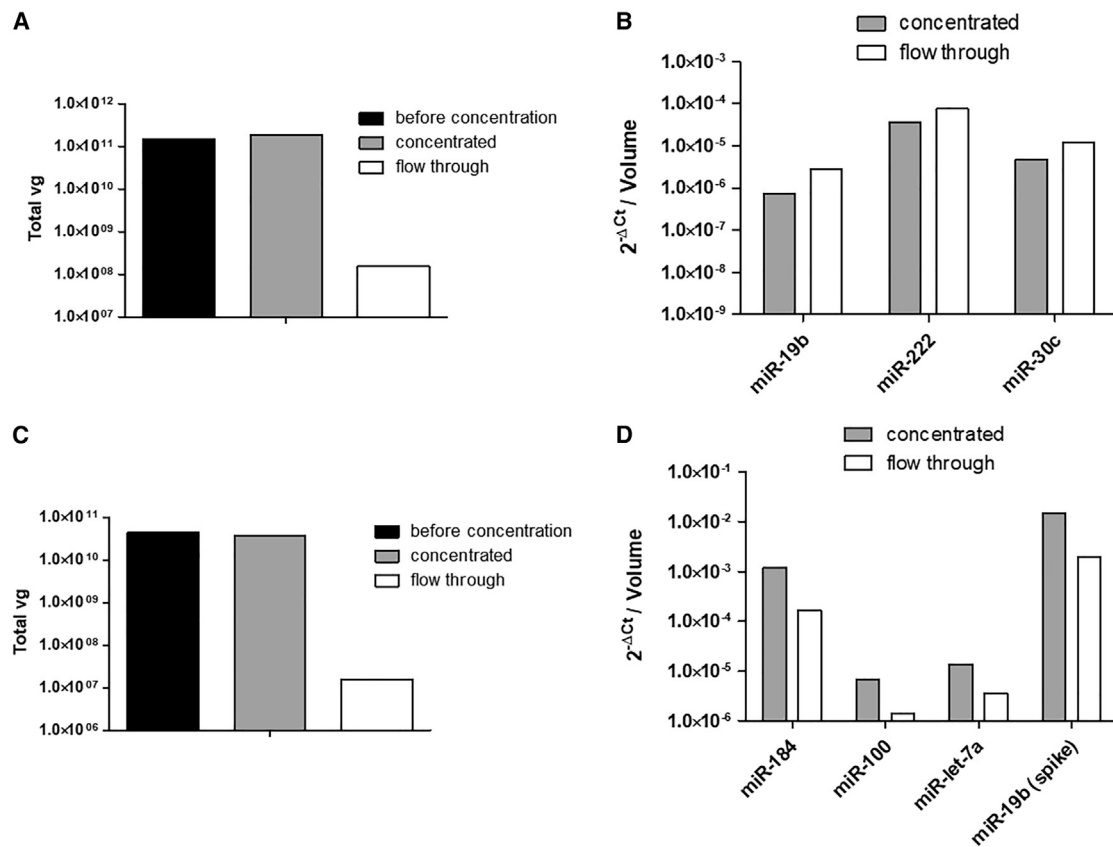

**Figure 5. Filtration assay on Amicon centrifugal filters**

AAV8-GFP were produced in HEK293 (A and B) or in Sf9 cells (C and D) and purified by the CsCl gradient method. AAV vectors were loaded on a centrifugal filter of 100 kDa MWCO that does not allow the AAV particles to pass through. A synthetic miR-19 was spiked before filtration in the Sf9-derived AAV sample, as control of free miRNA. Vector genomes (A and C) were quantified by qPCR before concentration, and in the concentrated (C) and flowthrough (FT) fractions. The quantity of residual miRNAs (B and D) was quantified by RT-qPCR in the C and FT fractions after centrifugation.

v.3.0, or Card A only (Thermo Fisher Scientific) on the 7900HT Real-Time PCR System (Thermo Fisher Scientific, Applied Biosystems) according to the manufacturer's guidelines. Quantification cycle (Cq) values were calculated with the Applied Biosystems SDS software v.2.3 by using automatic baseline with a threshold set at 0.1.

#### Filtration assays

Filtration assays were performed from CsCl-purified AAV8 produced either in HEK293 cells or Sf9 cells. Prior to filtration,  $2 \times 10^9$  copies of a miR-19b mimic were spiked in 200  $\mu$ L of Sf9-derived sample. An Amicon Ultra-4 centrifugal filter of 100 kDa MWCO (Millipore, Merck) was pre-wet with 2 mL dPBS and centrifuged for 2 min at 3,000 rpm at 20°C. The FT was discarded, 500  $\mu$ L of AAV vectors was loaded onto the filter, and a short centrifugation was performed 30 s at 3,000 rpm at 20°C for particle concentration. The concentrated sample and the FT were recovered from the top and bottom of the tube, respectively. The three more abundant miRNAs were quantified by RT-qPCR from 200  $\mu$ L of each fraction (before concentration, concentrated, and FT). Data were normalized by the volume of each fraction. In parallel, the copy number of vector genomes was

determined by qPCR from 10  $\mu$ L of each fraction similarly to the quality control assay.

#### RNase digestion assay

For the RNase treatment of rAAV, the following mixture was prepared: 150  $\mu$ L of AAV vector, 50  $\mu$ L of RNase, 75  $\mu$ L of RNase buffer (10 mM Tris-HCl, 5 mM MgCl<sub>2</sub> [pH 7.5]) and  $4.2 \times 10^8$  copies of a miR-19b mimic. For the "no RNase" condition, RNase was replaced with an equivalent volume of RNase buffer. For the "RNase A" condition, RNase A at 7,000 U/mL (QIAGEN) was used. For the "RNase A + RNase L" condition, Ambion RNase cocktail enzyme mix (Thermo Fisher Scientific) was added, comprising RNase A (500 U/mL) and RNase T1 (20,000 U/mL). After incubation 2 h at 37°C, QIAzol was added to the mixture, along with the Cel-miR-39 SIC (QIAGEN) for normalization. miRNAs were then isolated and quantified by RT-qPCR.

#### Statistical analysis

The Pearson correlation coefficient and Mann-Whitney U-test were carried out using GraphPad Prism 5 (GraphPad Software). The

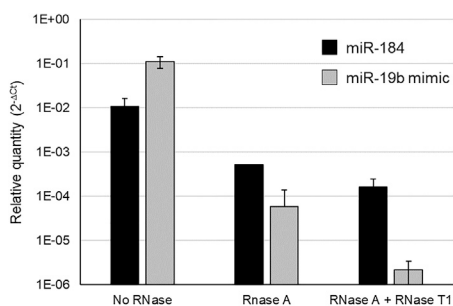

**Figure 6. Removal of miRNA by RNase pretreatment of rAAV batches**

RNase digestion was realized in duplicate on a CsCl-purified AAV8-GFP batch produced in Sf9 cells. RT-qPCR was performed targeting miR-184 (black) and miR-19b mimic (gray) that was spiked before RNase treatment. The miRNA relative quantity was calculated using the SIC by the  $\Delta C_t$  method for 200  $\mu$ L of AAV.

mean and the standard deviation of the biological and technical replicates were calculated and represented on the figures.

#### DATA AND CODE AVAILABILITY

RT-qPCR raw data of TLDA analyses were deposited in the Gene Expression Omnibus,<sup>26</sup> an international public repository, under accession number GSE270691.

#### SUPPLEMENTAL INFORMATION

Supplemental information can be found online at <https://doi.org/10.1016/j.omtm.2024.101305>.

#### ACKNOWLEDGMENTS

We would like to warmly thank the Vector Core of TaRGeT laboratory (Nantes, France) for AAV vector production, purification, and quality controls. We are also grateful to Adrien Léger for giving his scientific input during the initiation of the study. Automated electrophoresis was performed at the Genomics and Core Facility of Nantes (GenoA, Nantes, France). This research was supported by the Région Pays de la Loire, the Centre hospitalier universitaire (CHU) de Nantes, Nantes Université, and the Institut National de la Santé et de la Recherche Médicale (INSERM).

#### AUTHOR CONTRIBUTIONS

M.P.-B. designed experiments, supervised the study, and wrote the manuscript. E.A. designed experiments, participated to the scientific supervision, reviewed the manuscript, and raised funds. O.A. raised funds and provided resources required for the study. Q.L. developed the RT-qPCR assays and realized experiments. L.J.-L. realized the TLDA analysis. E.L. analyzed the TLDA data, realized experiments, and performed bioinformatics analysis. S.P. performed miRNA quantification and designed the filtration experiment. F.B. designed and realized RNase tests. C.R. and V.B. supervised the purification process of AAV vectors. A.G.-D. performed experiments and bioinformatics analyses. J.-B.D. provided valuable scientific discussion.

#### DECLARATION OF INTERESTS

M.P.-B. and E.A. are inventors of patents related to AAV gene therapy licensed to biopharma companies.

#### REFERENCES

- Muhuri, M., Maeda, Y., Ma, H., Ram, S., Fitzgerald, K.A., Tai, P.W., and Gao, G. (2021). Overcoming innate immune barriers that impede AAV gene therapy vectors. *J. Clin. Invest.* *131*, e143780.
- Costa-Verdera, H., Unzu, C., Valeri, E., Adriouch, S., González Aseguinolaza, G., Mingozzi, F., and Kajaste-Rudnitski, A. (2023). Understanding and Tackling Immune Responses to Adeno-Associated Viral Vectors. *Hum. Gene Ther.* *34*, 836–852.
- Duan, D. (2023). Lethal immunotoxicity in high-dose systemic AAV therapy. *Mol. Ther.* *31*, 3123–3126.
- Ghauri, M.S., and Ou, L. (2023). AAV Engineering for Improving Tropism to the Central Nervous System. *Biology* *12*, 186.
- Penaud-Budloo, M., François, A., Clément, N., and Ayuso, E. (2018). Pharmacology of Recombinant Adeno-associated Virus Production. *Mol. Ther. Methods Clin. Dev.* *8*, 166–180.
- Brimble, M.A., Winston, S.M., and Davidoff, A.M. (2023). Stowaways in the cargo: Contaminating nucleic acids in rAAV preparations for gene therapy. *Mol. Ther.* *31*, 2826–2838.
- Gimpel, A.L., Katsikis, G., Sha, S., Maloney, A.J., Hong, M.S., Nguyen, T.N.T., Wolfrum, J., Springs, S.L., Sinskey, A.J., Manalis, S.R., et al. (2021). Analytical methods for process and product characterization of recombinant adeno-associated virus-based gene therapies. *Mol. Ther. Methods Clin. Dev.* *20*, 740–754.
- Wright, J.F. (2014). Product-Related Impurities in Clinical-Grade Recombinant AAV Vectors: Characterization and Risk Assessment. *Biomedicines* *2*, 80–97.
- Bucher, K., Rodríguez-Bocanegra, E., Wissinger, B., Strasser, T., Clark, S.J., Birkenfeld, A.L., Siegel-Axel, D., and Fischer, M.D. (2023). Extra-viral DNA in adeno-associated viral vector preparations induces TLR9-dependent innate immune responses in human plasmacytoid dendritic cells. *Sci. Rep.* *13*, 1890.
- Recommendations for the evaluation of animal cell cultures as substrates for the manufacture of biological medicinal products and for the characterization of cell banks, Annex 3, World Health Organization Technical Report Series No 978. <https://www.who.int/publications/m/item/animal-cell-culture-trs-no-978-annex3>.
- Tian, W., Dong, X., Liu, X., Wang, G., Dong, Z., Shen, W., Zheng, G., Lu, J., Chen, J., Wang, Y., et al. (2012). High-throughput functional microRNAs profiling by recombinant AAV-based microRNA sensor arrays. *PLoS One* *7*, e29551.
- Landgraf, P., Rusu, M., Sheridan, R., Sewer, A., Iovino, N., Aravin, A., Pfeffer, S., Rice, A., Kamphorst, A.O., Landthaler, M., et al. (2007). A mammalian microRNA expression atlas based on small RNA library sequencing. *Cell* *129*, 1401–1414.
- Panwar, B., Omenn, G.S., and Guan, Y. (2017). miRmine: a database of human miRNA expression profiles. *Bioinforma. Oxf. Engl.* *33*, 1554–1560.
- Mehrabadi, M., Hussain, M., and Asgari, S. (2013). MicroRNAome of *Spodoptera frugiperda* cells (Sf9) and its alteration following baculovirus infection. *J. Gen. Virol.* *94*, 1385–1397.
- Olive, V., Bennett, M.J., Walker, J.C., Ma, C., Jiang, I., Cordon-Cardo, C., Li, Q.-J., Lowe, S.W., Hannon, G.J., and He, L. (2009). miR-19 is a key oncogenic component of mir-17-92. *Genes Dev.* *23*, 2839–2849.
- Wang, D., Sang, Y., Sun, T., Kong, P., Zhang, L., Dai, Y., Cao, Y., Tao, Z., and Liu, W. (2021). Emerging roles and mechanisms of microRNA-222-3p in human cancer (Review). *Int. J. Oncol.* *58*, 20.
- Ceolotto, G., Giannella, A., Albiero, M., Kuppasamy, M., Radu, C., Simioni, P., Garlaschelli, K., Baragetti, A., Catapano, A.L., Iori, E., et al. (2017). miR-30c-5p regulates macrophage-mediated inflammation and pro-atherosclerosis pathways. *Cardiovasc. Res.* *113*, 1627–1638.
- Li, Y.-B., Sun, F.-N., Ma, X.-Y., Qu, H., and Yu, Y. (2019). MiR-888 promotes cell migration and invasion of hepatocellular carcinoma by targeting SMAD4. *Eur. Rev. Med. Pharmacol. Sci.* *23*, 2020–2027.

19. Jiang, Q., Wang, Y., Hao, Y., Juan, L., Teng, M., Zhang, X., Li, M., Wang, G., and Liu, Y. (2009). miR2Disease: a manually curated database for microRNA deregulation in human disease. *Nucleic Acids Res.* 37, D98–D104.
20. Wang, J., Xing, K., Xiong, P., Liang, H., Zhu, M., Zhao, J., Yu, X., Ning, X., Li, R., and Wang, X. (2021). Identification of miRNAs encoded by *Autographa californica* nucleopolyhedrovirus. *J. Gen. Virol.* 102, XX.
21. Motta, L.F., Cerrudo, C.S., and Belaich, M.N. (2024). A Comprehensive Study of MicroRNA in Baculoviruses. *Int. J. Mol. Sci.* 25, 603.
22. Penaud-Budloo, M., Lecomte, E., Guy-Duché, A., Saleun, S., Roulet, A., Lopez-Roques, C., Tournaire, B., Cogné, B., Léger, A., Blouin, V., et al. (2017). Accurate Identification and Quantification of DNA Species by Next-Generation Sequencing in Adeno-Associated Viral Vectors Produced in Insect Cells. *Hum. Gene Ther. Methods* 28, 148–162.
23. Jacob, A., Brun, L., Jiménez Gil, P., Ménard, L., Bouzelha, M., Broucque, F., Roblin, A., Vandenbergh, L.H., Adjali, O., Robin, C., et al. (2021). Homologous Recombination Offers Advantages over Transposition-Based Systems to Generate Recombinant Baculovirus for Adeno-Associated Viral Vector Production. *Biotechnol. J.* 16, e2000014.
24. Ayuso, E., Blouin, V., Lock, M., McGorray, S., Leon, X., Alvira, M.R., Auricchio, A., Bucher, S., Chtarto, A., Clark, K.R., et al. (2014). Manufacturing and characterization of a recombinant adeno-associated virus type 8 reference standard material. *Hum. Gene Ther.* 25, 977–987.
25. Saleun, S., Mas, C., Le Roy, A., Penaud-Budloo, M., Adjali, O., Blouin, V., and Ebel, C. (2023). Analytical ultracentrifugation sedimentation velocity for the characterization of recombinant adeno-associated virus vectors sub-populations. *Eur. Biophys. J.* 52, 367–377.
26. Barrett, T., Wilhite, S.E., Ledoux, P., Evangelista, C., Kim, I.F., Tomashevsky, M., Marshall, K.A., Phillippy, K.H., Sherman, P.M., Holko, M., et al. (2013). NCBI GEO: archive for functional genomics data sets—update. *Nucleic Acids Res.* 41, D991–D995.

**Supplemental information**

**Characterization of residual microRNAs in AAV  
vector batches produced in HEK293 mammalian  
cells and Sf9 insect cells**

**Magalie Penaud-Budloo, Emilie Lecomte, Quentin Lecomte, Simon Pacouret, Frédéric Broucque, Aurélien Guy-Duché, Jean-Baptiste Dupont, Laurence Jeanson-Leh, Cécile Robin, Véronique Blouin, Eduard Ayuso, and Oumeya Adjali**



1 2 3 4 5 6 7 8

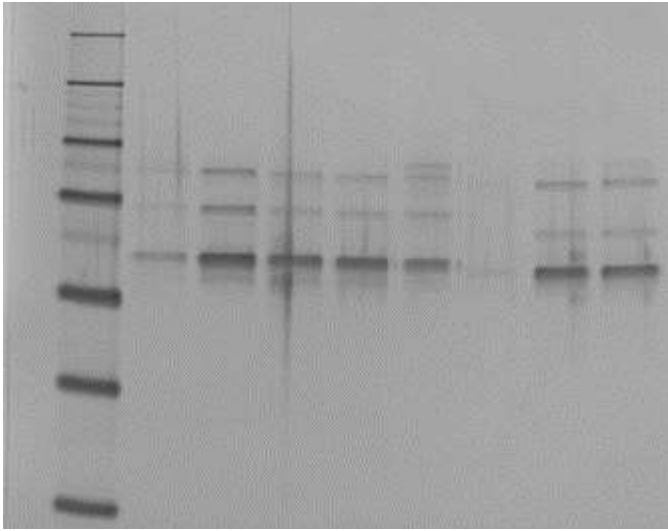

| Lane         | 1    | 2       | 3    | 4    | 5          | 6    | 7    | 8          |
|--------------|------|---------|------|------|------------|------|------|------------|
| Batch        | 9    | 7       | 6    | 1    | 2          | 5    | 3    | 4          |
| Sample       | AAV8 | AAV8    | AAV8 | AAV8 | AAV8 empty | AAV2 | AAV2 | AAV2 empty |
| Purification | IA   | IA+CsCl | CsCl | CsCl | CsCl       | CsCl | CsCl | CsCl       |
| Purity (%)   | 93.2 | 85.6    | 73.7 | 85.2 | 76.0       | nd   | 100  | 95.5       |

**Figure S1: Quality controls of rAAV batches produced in HEK293 cells.** Purity was determined by SDS-PAGE realized from  $2 \times 10^{10}$  total particles per rAAV sample, and expressed in percentage of AAV VP1, VP2 and VP3 proteins to total proteins. nd: not determined.

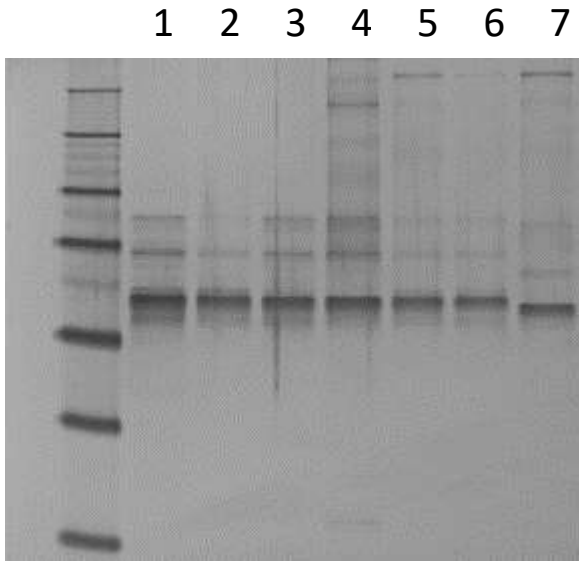

| Lane         | 1    | 2       | 3          | 4    | 5    | 6    | 7    |
|--------------|------|---------|------------|------|------|------|------|
| Batch        | 15   | 13      | 14         | 10   | 11   | 12   | 16   |
| Serotype     | AAV8 | AAV8    | AAV8 empty | AAV8 | AAV8 | AAV8 | AAV2 |
| Purification | IA   | IA+CsCl | IA+CsCl    | CsCl | CsCl | CsCl | CsCl |
| Purity (%)   | 79.5 | 84.7    | 79.5       | 56.1 | 84.5 | 85.7 | 78.9 |

**Figure S2: Quality controls of rAAV batches produced in Sf9 cells.** Purity was determined by SDS-PAGE realized from  $2 \times 10^{10}$  total particles per rAAV sample, and expressed in percentage of AAV VP1, VP2 and VP3 proteins to total proteins.

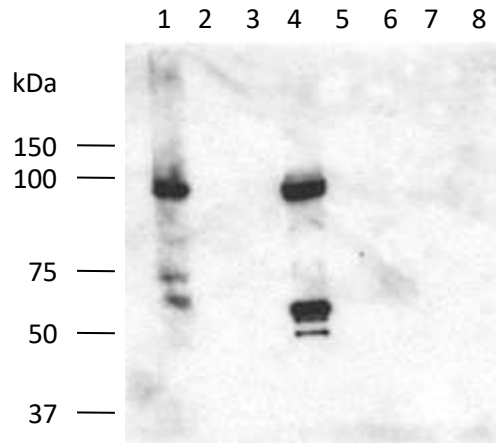

**Figure S3: Detection of Ago-2 in AAV samples by Western Blot.**

5  $\mu$ g of HEK293 total protein extract (1) and 25  $\mu$ L of purified empty or full rAAV were loaded on a 4-12% acrylamide tris gel. AAV2 (5) and AAV8 (2, 3, 4, 6, 7, 8) vectors were produced in HEK293 cells and purified by CsCl gradient ultracentrifugation (2 to 5), IA column (6) or CsCl followed by IA (7, 8). After SDS-PAGE, western blot was realized using the anti-Argonaute-2 antibody (Abcam, ab186733) diluted at 1:1000 and the donkey anti-rabbit IgG-HRP (Jackson ImmunoResearch, 711-035-152) at 1:20000 as secondary antibody. Predicted Ago-2 molecular weight is 97 kDa. The anti-Ago-2 antibody does not recognize Argonaute proteins of Sf9 insect cells. For rAAV batch correspondence, refer to Table S3: batch 6 (2), batch 1 (3), batch 2 (4), batch 3 (5), batch 9 (6), batch 7 (7) and batch 8 (8).

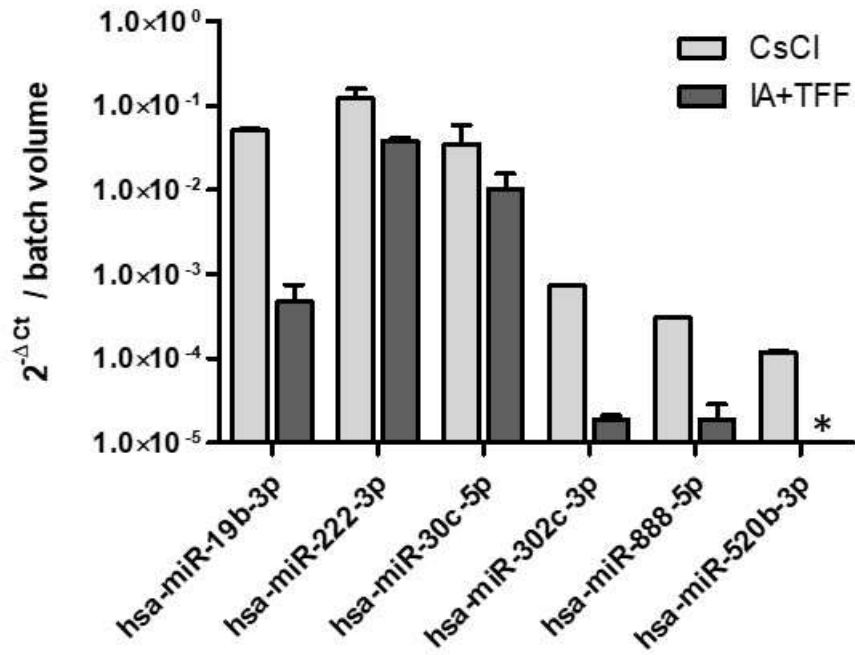

**Figure S4: Impact of the purification process on the residual miRNA content.** A 5-L bulk of AAV8 produced in Sf9 insect cells by dual-baculovirus infection was divided into two equal parts before purification by CsCl or IA-TFF. The asterisk indicates that Ct is below the qPCR threshold. The mean and standard deviation of two biological replicates are presented.



**Table S1: Quantification of miRNA in rAAV batches using the Qubit fluorometer.**

| Platform | Platform | Serotype | Fraction   | Purification | miRNA concentration (ng/ $\mu$ L) | Quantity of miRNA (ng) per 1E10 vg |
|----------|----------|----------|------------|--------------|-----------------------------------|------------------------------------|
| Batch 17 | HEK293   | AAV8     | full       | CsCl         | 1.86                              | 3.2                                |
| Batch 18 | HEK293   | AAV8     | full+empty | IA           | 0.22                              | 0.8                                |
| Batch 19 | HEK293   | AAV8     | full       | CsCl         | 0.69                              | 0.5                                |
| Batch 20 | HEK293   | AAV8     | full+empty | IA           | 2.67                              | 2.9                                |
| Batch 21 | Sf9      | AAV8     | full       | CsCl         | 5.95                              | 5.4                                |
| Batch 22 | Sf9      | AAV8     | full       | CsCl         | 2.26                              | 3.7                                |
| Batch 23 | Sf9      | AAV8     | full+empty | IA           | 2.49                              | 9.6                                |

**Table S2: MicroRNAs selected for RT-qPCR quantification.**

| Cells<br>(organism)                     | miRNA name        | miRBase<br>accession number | miR Sequence 5' to 3'   |
|-----------------------------------------|-------------------|-----------------------------|-------------------------|
| HEK293<br>( <i>Homo sapiens</i> )       | hsa-miR-19b-3p    | MIMAT0000074                | UGUGCAAUCCAUGCAAACUGA   |
|                                         | hsa-miR-222-3p    | MIMAT0000279                | AGCUACAUCUGGCUACUGGGU   |
|                                         | hsa-miR-30c-5p    | MIMAT0000244                | UGUAAACAUCUACACUCUCAGC  |
|                                         | hsa-miR-302c-3p   | MIMAT0000717                | UAAGUGCUUCCAUGUUUCAGUGG |
|                                         | hsa-miR-888-5p    | MIMAT0004916                | UACUCAAAAAGCUGUCAGUCA   |
|                                         | hsa-miR-520b-3p   | MIMAT0002843                | AAAGUGCUUCCUUUUAGAGGG   |
| Sf9<br>( <i>Spodoptera frugiperda</i> ) | hsa-miR-184       | MIMAT0000454                | UGGACGGAGAACUGAUAAAGGGU |
|                                         | sfr-miR-bantam-3p | na                          | UGAGAUCAUUGUGAAAGCUGAU  |
|                                         | hsa-miR-100-5p    | MIMAT0000098                | AACCCGUAGAUCCGAACUUGUG  |
|                                         | hsa-miR-10a-5p    | MIMAT0000253                | UACCCUGUAGAUCCGAAUUUGUG |
|                                         | hsa-let-7a-5p     | MIMAT0000062                | UGAGGUAGUAGGUUGUAUAGUU  |
|                                         | hsa-miR-33a-5p    | MIMAT0000091                | GUGCAUUGUAGUUGCAUUGCA   |

Sf9 miRNAs were selected from Mehrabadi *et al.* Gen Virol 2013. na: not applicable.

**Table S3: rAAV batches analyzed in the study.**

| Platform | Batch number | Bulk number | Serotype | Fraction   | Purification | vg/mL   | p/mL    | p/vg  |
|----------|--------------|-------------|----------|------------|--------------|---------|---------|-------|
| HEK293   | 1            | 6788        | AAV8     | full       | CsCl         | 2.1E+13 | 2.1E+13 | 1.0   |
|          | 2            | 6788        | AAV8     | empty      | CsCl         | 7.1E+10 | 5.0E+13 | 704.2 |
|          | 3            | 6789        | AAV2     | full       | CsCl         | 2.7E+12 | 5.1E+12 | 1.9   |
|          | 4            | 6789        | AAV2     | empty      | CsCl         | 3.0E+10 | 3.3E+12 | 110.0 |
|          | 5            | BACTRANS008 | AAV2     | full       | CsCl         | 3.8E+11 | 5.8E+11 | 1.6   |
|          | 6            | BACTRANS027 | AAV8     | full       | CsCl         | 2.6E+13 | 3.5E+13 | 1.3   |
|          | 7            | BACTRANS035 | AAV8     | full       | IA+CsCl      | 7.1E+12 | 6.1E+12 | 0.9   |
|          | 8            | BACTRANS035 | AAV8     | empty      | IA+CsCl      | 2.0E+10 | nd      | nd    |
|          | 9            | BACTRANS035 | AAV8     | full+empty | IA           | 7.7E+12 | 2.0E+13 | 2.6   |
|          | 17           | 6855        | AAV8     | full       | CsCl         | 5.9E+12 | nd      | nd    |
|          | 18           | 6855        | AAV8     | full+empty | IA           | 2.6E+12 | nd      | nd    |
|          | 19           | 6856        | AAV8     | full       | CsCl         | 1.5E+13 | nd      | nd    |
|          | 20           | 6856        | AAV8     | full+empty | IA           | 9.2E+12 | nd      | nd    |
| Sf9      | 10           | AAVBAC243   | AAV8     | full       | CsCl         | 1.8E+12 | 4.7E+12 | 2.6   |
|          | 11           | AAVBAC312   | AAV8     | full       | CsCl         | 7.9E+12 | 1.6E+13 | 2.0   |
|          | 12           | AAVBAC314   | AAV8     | full       | CsCl         | 8.9E+12 | 1.9E+13 | 2.1   |
|          | 13           | AAVBAC307   | AAV8     | full       | IA+CsCl      | 1.1E+13 | 2.6E+13 | 2.4   |
|          | 14           | AAVBAC307   | AAV8     | empty      | IA+CsCl      | 2.5E+11 | 5.5E+13 | 220.0 |
|          | 15           | AAVBAC307   | AAV8     | full+empty | IA           | 3.2E+13 | 1.7E+14 | 5.4   |
|          | 16           | AAVBAC313   | AAV2     | full       | CsCl         | 2.2E+12 | 6.9E+12 | 3.1   |
|          | 21           | AAVBAC390   | AAV8     | full       | CsCl         | 1.1E+13 | nd      | nd    |
|          | 22           | AAVBAC391   | AAV8     | full       | CsCl         | 6.1E+12 | nd      | nd    |
|          | 23           | AAVBAC386   | AAV8     | full+empty | IA           | 2.6E+12 | nd      | nd    |

AAV vectors were generated with the CMV-eGFP-HBBpA cassette. The concentration in vector genome per mL (vg/mL) was determined by qPCR targeting ITRs. Capsid titer in particle per mL (p/mL) was determined by ELISA. nd: not determined.

**Table S4: Correlation analysis of the miRNA profiles for HEK293-derived AAV vectors.**

| $r^{(1)}$      | HEK293 | batch 1 | batch 2 | batch 3 | batch 4 | batch 5 | batch 6 | batch 7 | batch 8 | batch 9 |
|----------------|--------|---------|---------|---------|---------|---------|---------|---------|---------|---------|
| <b>HEK293</b>  | na     | na      | na      | na      | na      | na      | na      | na      | na      | na      |
| <b>batch 1</b> | 0.95   | na      |
| <b>batch 2</b> | 0.96   | 0.94    | na      |
| <b>batch 3</b> | 0.20   | 0.38    | 0.04    | na      |
| <b>batch 4</b> | 0.69   | 0.78    | 0.54    | 0.84    | na      | na      | na      | na      | na      | na      |
| <b>batch 5</b> | 0.23   | 0.43    | 0.10    | 0.99    | 0.85    | na      | na      | na      | na      | na      |
| <b>batch 6</b> | 0.23   | 0.51    | 0.18    | 0.99    | 0.90    | 0.99    | na      | na      | na      | na      |
| <b>batch 7</b> | 0.78   | 0.86    | 0.65    | 0.76    | 0.99    | 0.77    | 0.83    | na      | na      | na      |
| <b>batch 8</b> | 0.99   | 0.98    | 0.95    | 0.29    | 0.76    | 0.33    | 0.42    | 0.84    | na      | na      |
| <b>batch 9</b> | 0.41   | 0.55    | 0.24    | 0.97    | 0.94    | 0.96    | 0.98    | 0.89    | 0.50    | na      |

<sup>(1)</sup> The Pearson correlation coefficient  $r$  was calculated from RT-qPCR data for the 6 selected miRNAs.

**Table S5: Correlation analysis of the miRNA profiles for Sf9-derived AAV vectors.**

| $r^{(1)}$       | Sf9  | batch 10 | batch 11 | batch 12 | batch 13 | batch 14 | batch 15 | batch 16 |
|-----------------|------|----------|----------|----------|----------|----------|----------|----------|
| <b>Sf9</b>      | na   | na       | na       | na       | na       | na       | na       | na       |
| <b>batch 10</b> | 0.63 | na       |
| <b>batch 11</b> | 0.75 | 0.98     | na       | na       | na       | na       | na       | na       |
| <b>batch 12</b> | 0.62 | 0.94     | 0.96     | na       | na       | na       | na       | na       |
| <b>batch 13</b> | 0.67 | 1.00     | 0.99     | 0.95     | na       | na       | na       | na       |
| <b>batch 14</b> | 0.67 | 1.00     | 0.99     | 0.95     | 1.00     | na       | na       | na       |
| <b>batch 15</b> | 0.64 | 1.00     | 0.99     | 0.95     | 1.00     | 1.00     | na       | na       |
| <b>batch 16</b> | 0.84 | 0.94     | 0.99     | 0.93     | 0.96     | 0.96     | 0.95     | na       |

<sup>(1)</sup> The Pearson correlation coefficient  $r$  was calculated from RT-qPCR data for the 6 selected miRNAs.
